# Supplementary material for: Dietary fibre in relation to asthma, allergic rhinitis and sensitization from childhood up to adulthood
Source: PubMed Central journal article supplement (PMC9382355; doi:10.1002/clt2.12188), 2022-08-17
Supplement: CLT2-12-e12188-s002.pdf [file CLT2-12-e12188-s002.pdf]

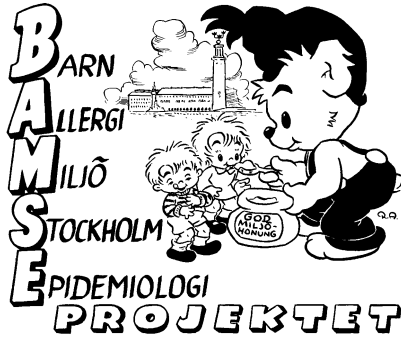

# Questions about the child's diet

Questionnaire for

**Bamse identification number**

Date when answering the FFQ

|\_2\_|\_0\_|\_0\_|\_|\_| - |\_|\_|\_| - |\_|\_|\_|

**f8dat**

Who filled out the FFQ?

**f8q\_a**

- 1  Mother
- 2  Father
- 3  The child
- 4  Other person, who? **f8q\_b**
- 5 = mother + child
- 6 = father + child
- 7 = mother + father
- 8 = mother + father + child
- 9 = other person + child

## Instructions

- Fill out the questionnaire together with your child.
- The questions cover what the child has eaten at home and in school and includes snacks.

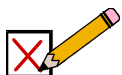

Du underlättar för oss om du skriver tydligt och markerar kryssrutorna klart.

## Dietary habits during the last 12 months

**f8q1** What type of milk do your child usually drink or eat, and how much per day or per week?

(1 glass = 2 dl)

|                                                                                                       | Glass per day                                   | Glass per week                                  |
|-------------------------------------------------------------------------------------------------------|-------------------------------------------------|-------------------------------------------------|
| <b>1</b> <input type="checkbox"/> Milk ≤0.5% fat                                                      | a_1   <input style="width: 40px;" type="text"/> | b_1   <input style="width: 40px;" type="text"/> |
| <b>2</b> <input type="checkbox"/> Milk 1.5% fat                                                       | a_2   <input style="width: 40px;" type="text"/> | b_2   <input style="width: 40px;" type="text"/> |
| <b>3</b> <input type="checkbox"/> Milk 3% fat                                                         | a_3   <input style="width: 40px;" type="text"/> | b_3   <input style="width: 40px;" type="text"/> |
| <b>4</b> <input type="checkbox"/> Sour milk or yogurt                                                 | a_4   <input style="width: 40px;" type="text"/> | b_4   <input style="width: 40px;" type="text"/> |
| <b>5</b> <input type="checkbox"/> Low fat sour milk or yogurt                                         | a_5   <input style="width: 40px;" type="text"/> | b_5   <input style="width: 40px;" type="text"/> |
| <b>6</b> <input type="checkbox"/> Chocolate milk (oboy)                                               | a_6   <input style="width: 40px;" type="text"/> | b_6   <input style="width: 40px;" type="text"/> |
| <b>7</b> <input type="checkbox"/> Other? <b>f8q1_7t</b> .....                                         | a_7   <input style="width: 40px;" type="text"/> | b_7   <input style="width: 40px;" type="text"/> |
| <b>8</b> <input type="checkbox"/> Drink or eat milk, sour milk or yogurt <b>less</b> than once a week |                                                 |                                                 |
| <b>9</b> <input type="checkbox"/> <b>Never</b> drink or eat milk, sour milk or yogurt                 |                                                 |                                                 |

**f8q2** What type of bread do your child usually eat, and how many slices per day or per week?

|                                                           | Slices per day                                  | Slices per week                                 |
|-----------------------------------------------------------|-------------------------------------------------|-------------------------------------------------|
| <b>1</b> <input type="checkbox"/> Crispbread              | a_1   <input style="width: 40px;" type="text"/> | b_1   <input style="width: 40px;" type="text"/> |
| <b>2</b> <input type="checkbox"/> White bread             | a_2   <input style="width: 40px;" type="text"/> | b_2   <input style="width: 40px;" type="text"/> |
| <b>3</b> <input type="checkbox"/> Wholemeal bread         | a_3   <input style="width: 40px;" type="text"/> | b_3   <input style="width: 40px;" type="text"/> |
| <b>4</b> <input type="checkbox"/> Bread with flaxseed     | a_4   <input style="width: 40px;" type="text"/> | b_4   <input style="width: 40px;" type="text"/> |
| <b>5</b> <input type="checkbox"/> "Limpa" (type of bread) | a_5   <input style="width: 40px;" type="text"/> | b_5   <input style="width: 40px;" type="text"/> |

**f8q3** How many slices of bread with butter or margarine does your child eat per day or per week?

slices per day

slices per week

**f8q4** How much butter/margarine does your child usually spread on his/her bread?

- 1  Thick
- 2  Fairly thick
- 3  Thin
- 4  Very thin
- 5  None at all

**f8q5** What types fat does your child usually use on sandwiches?

*(More than one option possible)*

- 1  Butter (80% fat)
- 2  "Bregott" (butter + rapeseed oli), 80% fat
- 3  Margarine, 60% fat
- 4  Margarine (e.g. Milda, Ädel, HushållsEve, 80% fat)
- 5  Light margarine (e.g. Lätta, Becel, Lätt&Lagom, 40% fat)
- 6  Light marargarine (e.g. Benecol, Leva, Becel pro.aktiv 40% fat)
- 7  Olive oil
- 8  Other
- 9  Do not know
- 10  Do not use any type of fat on bread

**f8q6** What type of cheese does your child usually eat, and how much per week or per months?

- 1  Cheese (more than 24% fat)
- 2  Cheese (less than 17% fat)
- 3  Dessert cheese
- 4  Spread cheese
- 5  Cottage cheese
- 6  Do not eat cheese

|   | Slices/tbs per day | Slices/tbs per week | Slices/tbs per months |
|---|--------------------|---------------------|-----------------------|
| 1 | a_1                | b_1                 | c_1                   |
| 2 | a_2                | b_2                 | c_2                   |
| 3 | a_3                | b_3                 | c_3                   |
| 4 | a_4                | b_4                 | c_4                   |
| 5 | a_5                | b_5                 | c_5                   |
| 6 |                    |                     |                       |

**f8q7** What type of fat does your family usually use for cooking?

*(More than one option possible)*

- 1 Butter
- 2 "Bregott" (butter + rapeseed oil), 80% fat
- 3 Margarine (e.g. Milda, Ädel, HushållsEve, 80% fat)
- 4 Margarine (e.g. Flora, Linnéa)
- 5 Liquid margarine
- 6 Cooking oil
- 7 Olive oil
- 8 Other
- 9 Do not know
- 10 Do not use fat for cooking

**f8q8** How much sugar or honey does your child usually use for tea, porridge, sour milk etc. altogether per day or week.

table spoons per day

table spoons per week

- c**
- 1 Eat sugar or honey less than once a month
  - 2 Never eat sugar or honey

**f8q9** Has your child taken any dietary supplements during the last 12 months?

- 1 Yes, regularly
- 2 Yes, sometimes
- 3 No

**f8q10** If yes, which of supplements has your child taken?

1 Multivitamins with minerals

Hur många tabl i veckan?

Sedan vilket år?

2 Multivitamins without minerals

3 AD-vitamins

4 Vitamin A

5 Vitamin D

6 Vitamin C

7 Other, what? **f8q10\_7t**
